# Supplementary material for: A huge novel polyoxometalate-based cluster Fe10P4W32exhibiting prominent electrocatalytic activity for the oxygen evolution reaction and third-order NLO properties
Source: Royal Society of Chemistry journal article supplement (doi:10.1039/c9cc03937f), 2019-01-01
Supplement: c9cc03937f1.pdf [file c9cc03937f1.pdf]

---

## A novel polyoxometalate-based huge cluster $\text{Fe}_{10}\text{P}_4\text{W}_{32}$ exhibiting prominent electrocatalytic activity for oxygen evolution reaction and third-order NLO properties

Wei Jiang,<sup>‡,a</sup> Xiao-Mei Liu,<sup>‡,a</sup> Jian Liu,<sup>b</sup> Jie Shi,<sup>a</sup> Jia-Peng Cao,<sup>a</sup> Xi-Ming Luo,<sup>a</sup> and Yan Xu<sup>\*,a,c</sup>

<sup>a</sup> College of Chemical Engineering, State Key Laboratory of Materials-Oriented Chemical Engineering, Nanjing Tech University, Nanjing 210009, P. R. China. E-mail: [yanxu@njtech.edu.cn](mailto:yanxu@njtech.edu.cn)

<sup>b</sup> School of Chemistry and Chemical Engineering, Liaoning Normal University, Liaoning 116029, P. R. China.

<sup>c</sup> Coordination Chemistry Institute, State Key Laboratory of Coordination Chemistry, Nanjing University, Nanjing 210093, P. R. China

|                                                             |    |
|-------------------------------------------------------------|----|
| Section 1 Experimental Section .....                        | 1  |
| I. Materials and General Methods .....                      | 1  |
| II. Synthesis schemes and method for target compounds ..... | 1  |
| III. Synthetic discussion .....                             | 2  |
| IV. X-ray Crystallographic Study .....                      | 2  |
| Section 2 Supplementary Structural Information .....        | 3  |
| Section 3 Supplementary Physical Characterizations .....    | 6  |
| Section 4 Additional performance studies .....              | 9  |
| I. Electrochemical experiment .....                         | 9  |
| II. Magnetic measurement .....                              | 10 |
| III. Electrocatalytic activities experiment .....           | 11 |
| IV. Nonlinear optical experiment .....                      | 11 |
| Section 5 The Selected bonds lengths and angles .....       | 14 |
| References : .....                                          | 19 |

---

## Section 1 Experimental Section

### I. Materials and General Methods

**Materials:** All the reagents and solvents used for compound synthesis are purchased from commercial sources and used directly without further purification. The  $K_{12}[\alpha\text{-H}_2\text{P}_2\text{W}_{12}\text{O}_{48}] \cdot 24\text{H}_2\text{O}$   $\{\text{P}_2\text{W}_{12}\}$ ,  $K_{16}[\alpha\text{-Si}_2\text{W}_{18}\text{O}_{66}] \cdot 25\text{H}_2\text{O}$   $\{\text{Si}_2\text{W}_{18}\}$  precursor and organic ligand DAPSC were prepared by known literature method.<sup>1-3</sup>

Powder X-ray diffraction (PXRD) patterns were measured on a Bruker D8X diffractometer equipped with monochromatized Cu- $K_\alpha$  radiation ( $\lambda = 1.5418 \text{ \AA}$ ) at room temperature. Data was collected in the range of 5-50 °. Elemental analyses (C, H and N) were determined on a Perkin-Elmer 2400 CHN elemental analyzer. FT-IR spectra were recorded on a Nicolet 8700 FTIR spectrometer with pressed KBr pellets in the range 4000-400  $\text{cm}^{-1}$ . EDS test was determined on a Hitachi S-4800. X-ray photoelectron spectroscopy (XPS) was measured on a Thermo ESCALAB 250.

### II. Synthesis schemes and method for target compounds

**Synthesis of 1:** A mixture of  $K_{12}[\alpha\text{-H}_2\text{P}_2\text{W}_{12}\text{O}_{48}] \cdot 24\text{H}_2\text{O}$  (0.2 g, 0.0508 mmol), DAPSC (0.02 g, 0.073 mmol),  $\text{FeCl}_2 \cdot 4\text{H}_2\text{O}$  (0.1g, 0.503 mmol) and 10 ml mixed solvent ( $\text{H}_2\text{O}:\text{CH}_3\text{CH}_2\text{OH} = 8:2$ ) was stirred for 1 h at room temperature. Then adjust the pH = 2.8 with 1M HCl. The resulting mixture was transferred into a Teflon-lined stainless-steel autoclave (25 ml) and heated at 120 °C for 3 days. After the autoclave slow cooled over 12 h at room temperature, the long black strip crystals were harvested, washed with deionized water and then dried at room temperature. Yield: 55 % (based on DAPSC). Elem anal. Calcd (%): C, 4.96; H, 1.48; N, 3.65. Found (%): C, 5.07; H, 1.37; N, 3.76. IR (KBr pellet,  $\text{cm}^{-1}$ ): 3347 (b), 2923 (m), 1660 (s), 1640 (s), 1085 (s), 954 (s), 908 (vs), 772 (s).

**Synthesis of 2:**  $K_{16}[\alpha\text{-Si}_2\text{W}_{18}\text{O}_{66}] \cdot 25\text{H}_2\text{O}$  (0.2 g, 0.0346 mmol), DAPSC (0.02 g, 0.073 mmol),  $\text{FeCl}_2 \cdot 4\text{H}_2\text{O}$  (0.1g, 0.503 mmol) and Molybdenum powder (0.06 g, 0.625 mmol) were dissolved in 10 ml distilled water and stirred for 1 h at room temperature. Then adjust the pH = 6.0 with 1M NaOH. Then, the mixture was transferred and sealed in a 25 mL Teflon-lined stainless steel container, and heated at 120 °C for 3 days. After the autoclave slow cooled over 12 h at room temperature, the long black strip crystals were obtained, washed with deionized water and then dried at room temperature. Yield: 35 % (based on DAPSC). Elem anal. Calcd (%): C, 7.66; H, 1.91; N, 5.62. Found (%): C, 7.72; H, 2.03; N, 5.73. IR (KBr pellet,  $\text{cm}^{-1}$ ): 3424 (b), 1661 (s), 940 (s), 736 (s).

### III. Synthetic discussion

During conventional hydro-/solvothermal method, numerous factors can affect the structures and the crystal growth of the final products. Such as the starting substances (initial reactant, stoichiometric proportion, etc) and the reaction conditions, (pH values, solvents, temperature, reaction temperature, etc). In our works, we obtained two dimer FeSPTs modified by planar Schiff DAPSC complexes  $\{\text{Fe}_{10}\text{P}_4\text{W}_{32}\}$  and  $\{\text{Fe}_8\text{MoW}_{18}\}$  under solvothermal or hydrothermal condition. Based on our previous works,<sup>4</sup> POMs-base compounds modified by Schiff base were obtained under the same or similar reaction conditions, which provided us with a lot of useful information to obtain the target product, such as the choice of temperature, solvent and pH value in the reaction system. By choosing appropriate solvent ( $\text{H}_2\text{O}$ ,  $\text{C}_2\text{H}_5\text{OH}$  DMF, and mixed solvent) and changing the pH of initial reactant, the target compounds can be obtained. In addition, a large number of parallel experiments were also implemented to explore the optimal conditions for reaction synthesis (pH = 2.8,  $\text{H}_2\text{O}:\text{C}_2\text{H}_5\text{OH} = 8:2$  mL,  $T = 120^\circ\text{C}$ ,  $t = 3\text{d}$  for **1**; pH = 6,  $\text{H}_2\text{O} = 10$  mL,  $T = 120^\circ\text{C}$ ,  $t = 3\text{d}$  for **2**). During the reaction, both  $\{\text{P}_2\text{W}_{12}\}$  and  $\{\text{Si}_2\text{W}_{18}\}$  were separated and self-assembled into new  $\{\text{P}_2\text{W}_{14}\}$  and  $\{\text{MoW}_{18}\}$  BBs. Based on numerous repeated experiments, the synthesized compounds showed good reproducibility and stable yield.

### IV. X-ray Crystallographic Study

**Single-crystal X-ray diffraction:** Single-crystal X-ray diffraction data for **1** and **2** were performed on a Bruker Apex II CCD equipped with a normal focus at 296 K, with a sealed tube X-ray source (Mo-K $\alpha$  radiation,  $\lambda = 0.71073$  Å) under the operate condition at 50 kV and 30 mA. The structure were solved by direct methods and refined by full-matrix least-squares refinement using the SHELXL-2018/3 program package. Anisotropic thermal parameters were used to refine all non-hydrogen atoms.

**Table S1.** Crystal data and structure refinement parameters for compounds **1** and **2**

| Compounds   | <b>1</b>                                                                                                 | <b>2</b>                                                                           |
|-------------|----------------------------------------------------------------------------------------------------------|------------------------------------------------------------------------------------|
| Formula     | $\text{C}_{44}\text{H}_{142}\text{Fe}_{10}\text{N}_{28}\text{Na}_4\text{O}_{169}\text{P}_4\text{W}_{32}$ | $\text{C}_{44}\text{H}_{134}\text{Fe}_8\text{MoN}_{28}\text{O}_{113}\text{W}_{18}$ |
| <i>F</i> w  | 10425.39                                                                                                 | 6715.82                                                                            |
| T (K)       | 296(2)                                                                                                   | 296(2)                                                                             |
| Space group | <i>P</i> -1                                                                                              | <i>P</i> 2(1)/n                                                                    |
| <i>a</i> /Å | 14.2296(13)                                                                                              | 11.929(2)                                                                          |
| <i>b</i> /Å | 15.8958(14)                                                                                              | 31.857(7)                                                                          |
| <i>c</i> /Å | 23.381(2)                                                                                                | 19.576(4)                                                                          |
| $\alpha$ /° | 75.199(10)                                                                                               | 90                                                                                 |
| $\beta$ /°  | 87.381(10)                                                                                               | 103.082(3)                                                                         |

|                                              |                                                    |                                                    |
|----------------------------------------------|----------------------------------------------------|----------------------------------------------------|
| $\gamma/^\circ$                              | 68.625(10)                                         | 90                                                 |
| $V/\text{\AA}^3$                             | 4754.7(7)                                          | 7246(3)                                            |
| $Z$                                          | 1                                                  | 2                                                  |
| $D_c$ (g·cm <sup>3</sup> )                   | 3.641                                              | 3.078                                              |
| $\mu$ (mm <sup>-1</sup> )                    | 20.166                                             | 15.195                                             |
| $F(000)$                                     | 4686                                               | 6160                                               |
| Theta range for data collection              | 0.902 to 25.01                                     | 1.245 to 27.003                                    |
| Crystal size(mm)                             | 0.14×0.13×0.12                                     | 0.12×0.11×0.1                                      |
| Limiting indices                             | -16 ≤ $h$ ≤ 16<br>-18 ≤ $k$ ≤ 18<br>-24 ≤ $l$ ≤ 27 | -14 ≤ $h$ ≤ 14<br>-33 ≤ $k$ ≤ 40<br>-23 ≤ $l$ ≤ 24 |
| Completeness                                 | 98.6 %                                             | 99.9 %                                             |
| Data/restraints/<br>parameters               | 16517/684/<br>1316                                 | 14461/54/<br>965                                   |
| Reflections collected                        | 33456                                              | 53336                                              |
| Independent reflections                      | 16517                                              | 14461                                              |
| $R_{int}$                                    | 0.0500                                             | 0.0691                                             |
| Final $R_1^a$ , $wR_2^b$ [ $I > \sigma(I)$ ] | 0.0444, 0.1090                                     | 0.0512, 0.1147                                     |
| Final $R_1^a$ , $wR_2^b$ (all data)          | 0.0679, 0.1231                                     | 0.0752, 0.1257                                     |
| GOF on $F^2$                                 | 0.990                                              | 1.08                                               |

$$^a R_1 = \frac{\sum ||F_o| - |F_c||}{\sum |F_o|}; \quad ^b wR_2 = \left\{ \frac{\sum [w(F_o^2 - F_c^2)^2]}{\sum [w(F_o^2)^2]} \right\}^{1/2}$$

## Section 2 Supplementary Structural Information

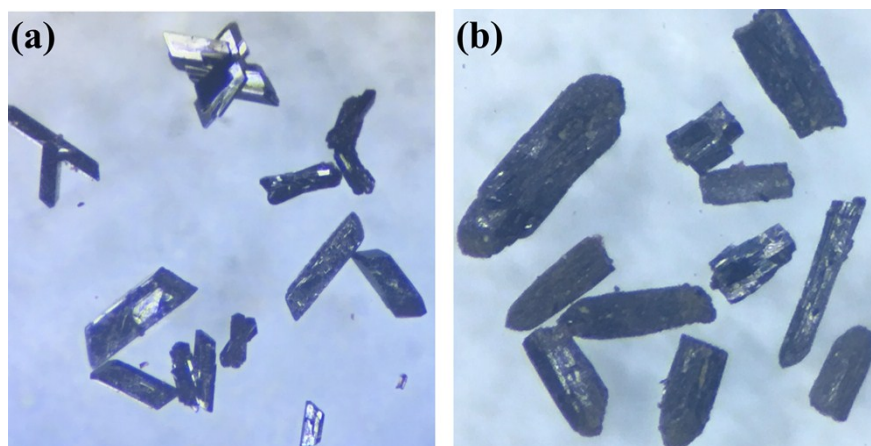

**Fig. S1** The photographs of compound 1 (a) and compound 2 (b) under an optical microscope.

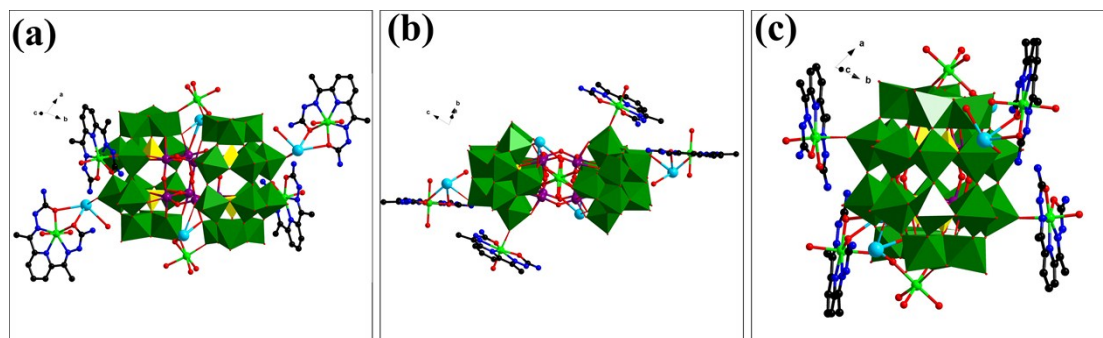

**Fig. S2** Polyhedral and ball-and-stick representation of **1** in different orientations: front view (a), right view (b), top view (c). Color code: PO<sub>4</sub> (yellow tetrahedra), WO<sub>6</sub> (green octahedra); W (green); Fe/W (purple); P (yellow); Fe (bright); Na (turquoise); O (red); C (black) and N (blue).

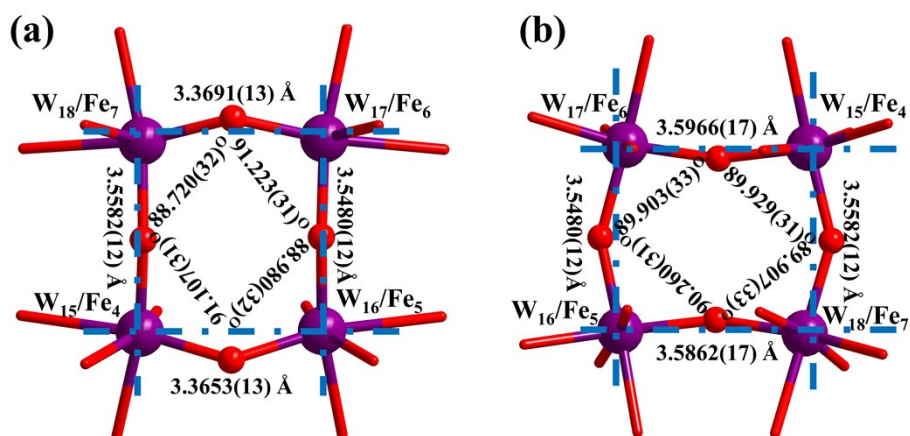

**Fig. S3** Connection patterns of {Fe<sub>2</sub>W<sub>2</sub>} unit in the quasi-cubane {Fe<sub>4</sub>W<sub>4</sub>} core (a) front-view, (b) left-view. Color code: W (green); Fe/W (purple); Fe (bright) and O (red).

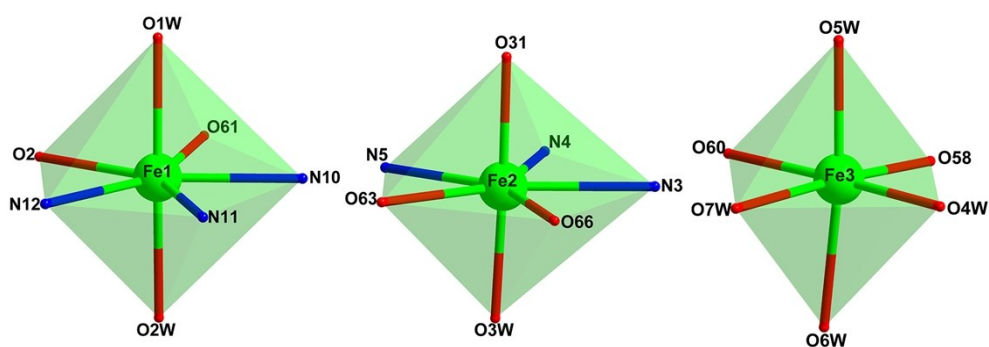

**Fig. S4** The coordination modes of iron ions of compound **1**.

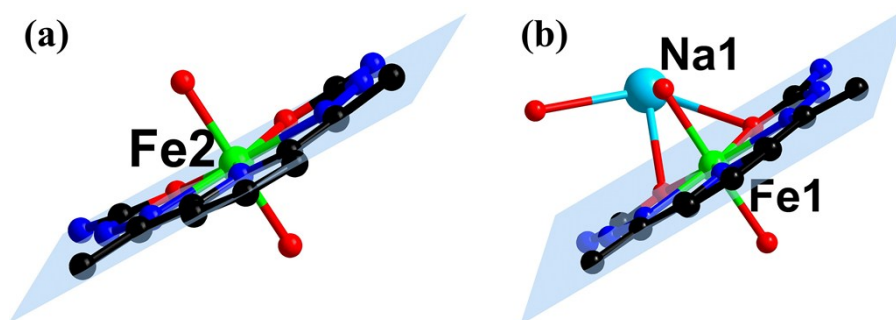

**Fig. S5** The rigid planar surface of all the non-hydrogen atoms in  $[\text{Fe}^{\text{II}}(\text{H}_2\text{O})(\text{DAPSC})]^{2+}$  (a) and  $[\text{Na}(\text{H}_2\text{O})\text{Fe}^{\text{II}}(\text{H}_2\text{O})_2(\text{DAPSC})]^{3+}$  (b) fragments of compound **1**.

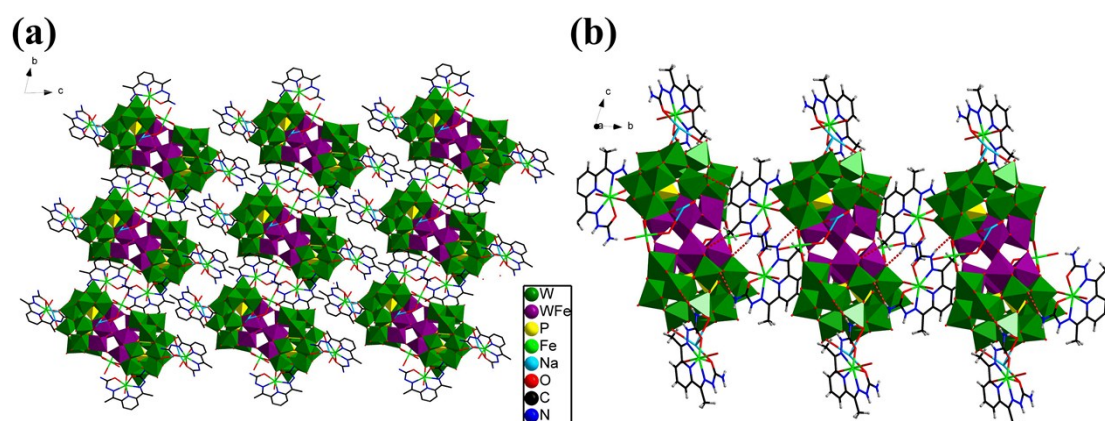

**Fig. S6** (a) Polyhedral and stick representation of 3D supramolecular framework of compound **1**. (b) The hydrogen-bonding interactions in compound **1**.

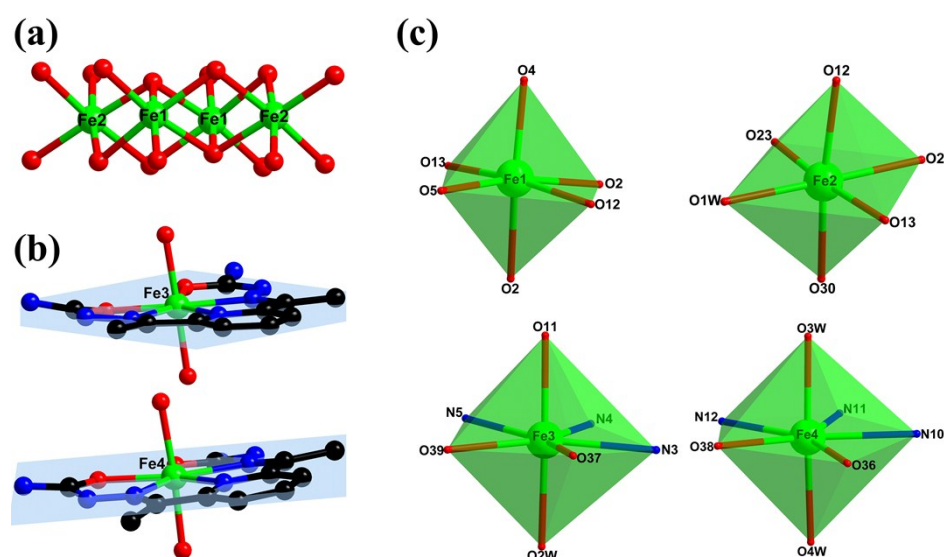

**Fig. S7** (a) Connection patterns of  $[\text{Fe}^{\text{III}}_4(\text{H}_2\text{O})_2]^{12+}$  metal cluster in **2a**. (b) The rigid planar surface of all the non-hydrogen atoms in  $[\text{Fe}^{\text{III}}(\text{H}_2\text{O})(\text{DAPSC})]^{3+}$  and  $[\text{Fe}^{\text{II}}(\text{H}_2\text{O})_2(\text{DAPSC})]^{2+}$  fragments of **2**. (c) The coordination modes of iron ion of compound **2**.

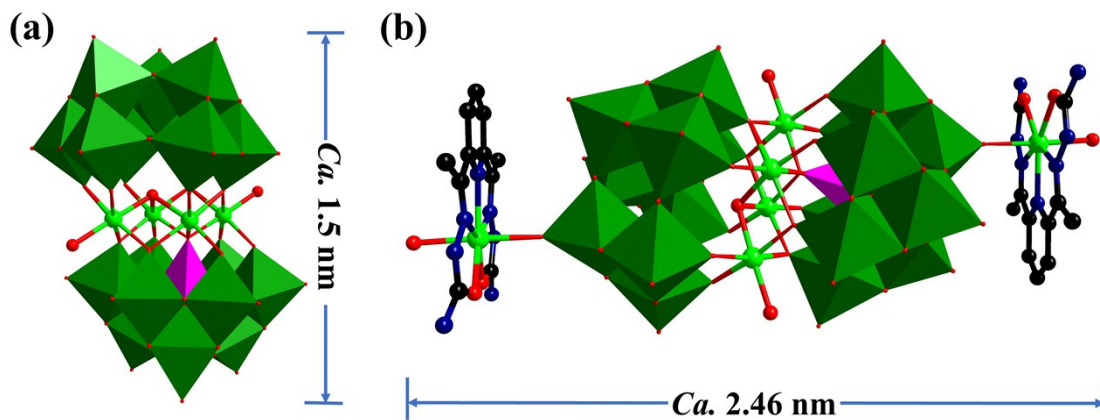

**Fig. S8** Polyhedral and ball-and-stick representation of **2a** (a) and **2** unit (b). Color codes: MoO<sub>4</sub> (pink tetrahedra), WO<sub>6</sub> (green octahedra); Mo (pink); W (green); Fe (bright green); O (red); C (black) and N (blue).

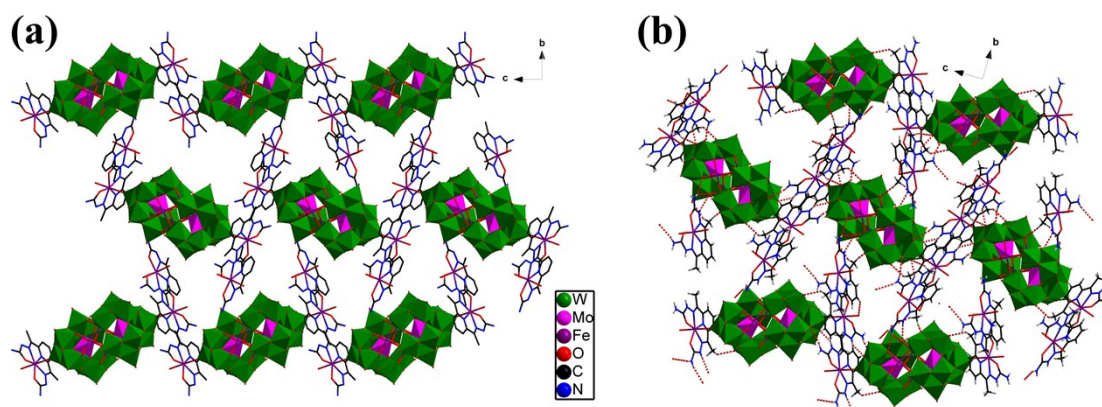

**Fig. S9** Polyhedral and stick representation of 3D supramolecular framework of compound **2** (a). The hydrogen-bonding interactions in compound **2** (b).

### Section 3 Supplementary Physical Characterizations

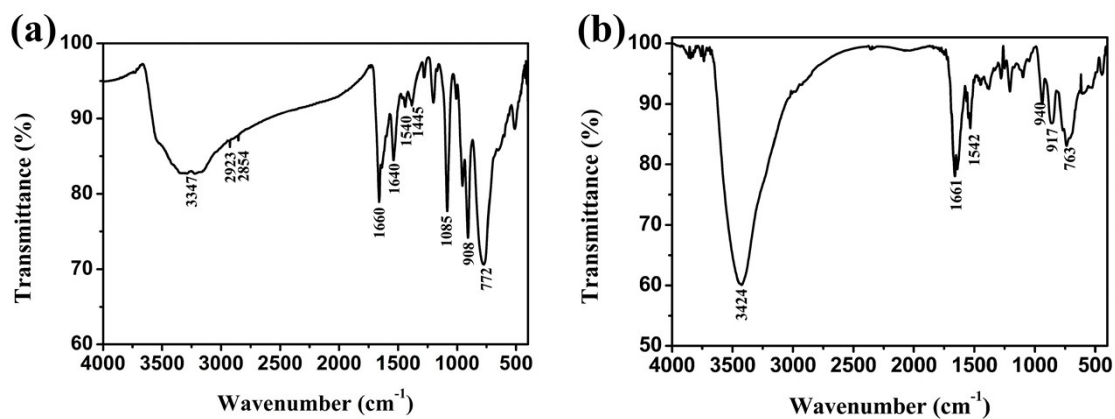

**Fig. S10** IR spectra of compound **1** (a) and compound **2** (b).

### The IR spectra analysis of the target compound

The IR spectra of the compound **1** and compound **2** were recorded between  $\nu = 4000 - 400 \text{ cm}^{-1}$  is shown in Fig. S12. These characteristic peaks can be summarized in two parts as following. DAPSC:  $2923 \text{ cm}^{-1}$ ,  $2954 \text{ cm}^{-1}$ ,  $1445 \text{ cm}^{-1}$ ,  $1381 \text{ cm}^{-1}$  (**1**) and  $2925 \text{ cm}^{-1}$ ,  $2851 \text{ cm}^{-1}$  (**2**) for  $\nu$  (C-H),  $1660 \text{ cm}^{-1}$ ,  $1640 \text{ cm}^{-1}$  (**1**) and  $1661 \text{ cm}^{-1}$   $1640 \text{ cm}^{-1}$  (**2**) for  $\nu$  (C=O),  $1540 \text{ cm}^{-1}$  (**1**) and  $1542 \text{ cm}^{-1}$  (**2**) for  $\nu$  (C=N);  $[\text{P}_4\text{W}_{32}\text{O}_{120}]^{28-}$  anion:  $1085 \text{ cm}^{-1}$  for  $\nu$  (P-O),  $954 \text{ cm}^{-1}$  for  $\nu$  (W=O),  $908 \text{ cm}^{-1}$  and  $772 \text{ cm}^{-1}$  for  $\nu$  (W-O-W),  $[\text{MoW}_{18}\text{O}_{68}]^{22-}$  anion:  $782 \text{ cm}^{-1}$  for  $\nu$  (Mo-O),  $940 \text{ cm}^{-1}$  for  $\nu$  (W=O),  $917 \text{ cm}^{-1}$  for  $\nu$  (W-O-W), which similar to compounds reported in the literature.<sup>4</sup> Additionally, the broad around at about  $3347 \text{ cm}^{-1}$  (**1**) and  $3424 \text{ cm}^{-1}$  (**2**) indicates the presence of water molecules.

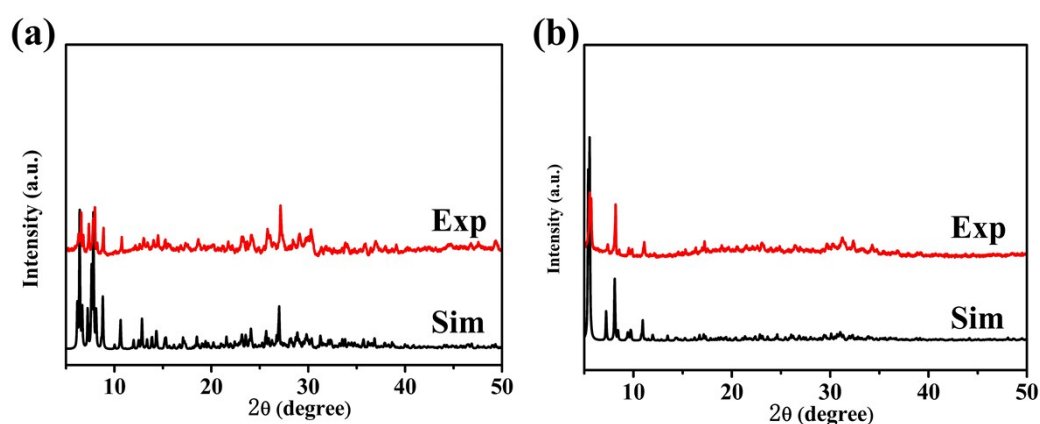

**Fig. S11** The experimental and simulated XRD patterns for compound **1** (a) and compound **2** (b). Sim represents the simulated pattern and Exp represents the pattern of as-synthesized sample, respectively.

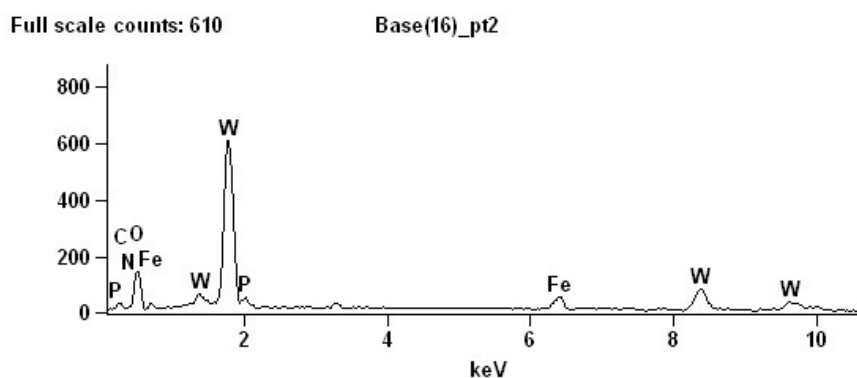

**Fig. S12** The EDS images of compound **1**.



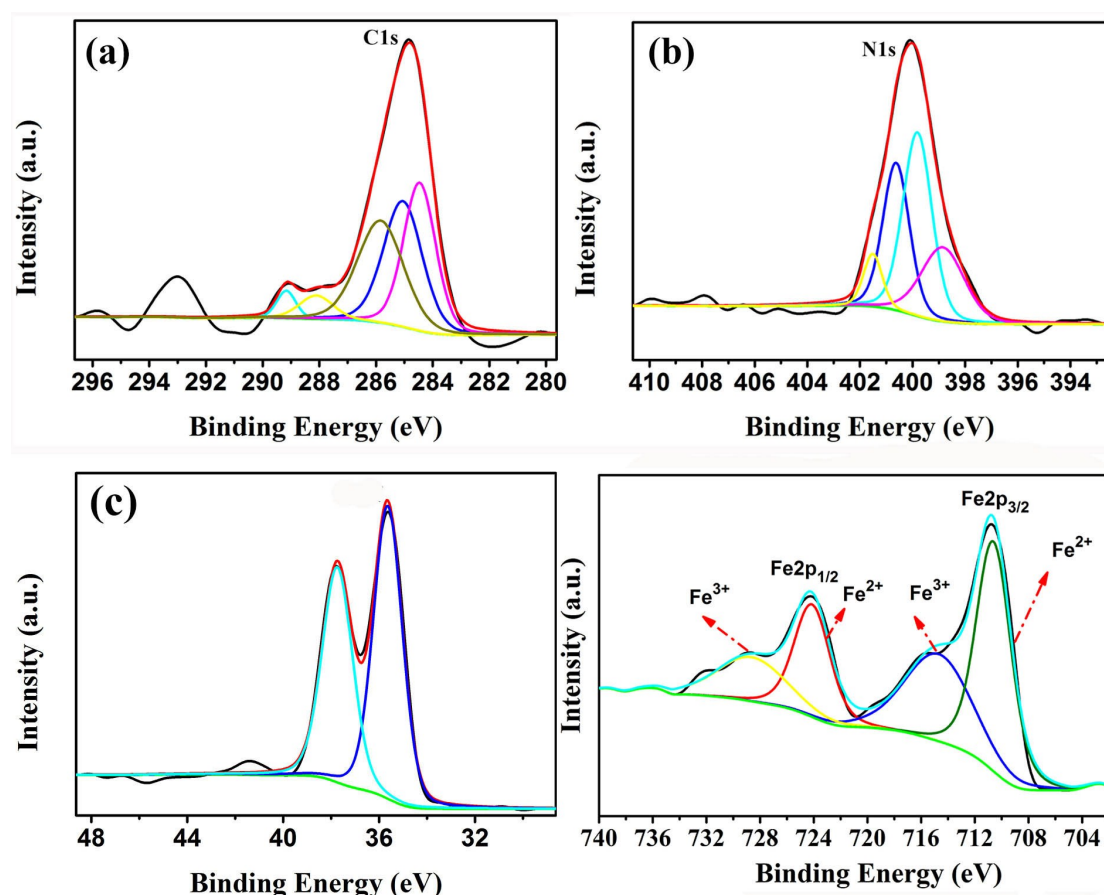

**Fig. S13** XPS spectra showing the binding energies of (a) C 1s, (b) N 1s, (c) W 4f and (d) Fe 2p in compound 1.

#### XPS spectra analyze:

The C 1s (Fig. S13a) spectra can be divided into five peaks at 284.6, 285.0, 285.8, 288.1 and 290.0 eV ascribed to C atoms in DAPSC ligand (C-H)/(C-C), (C=C), (C-N), (C=N) and (C=O), respectively.<sup>5</sup> The N 1s (Fig. S13b) spectra can be segmented into four peaks, the peaks at 399.8 eV and the two classic peaks at 400.7 and 401.5 eV can be attributed to amine (-NH<sub>2</sub>) group and (C-H) of DAPSC Ligand, and the peaks at 398.8 eV attributed to the interaction of nitrogen bound to the metal (Fe-N).<sup>6</sup> The W 4f (Fig. S13c) spectra appear two characteristic peaks at 35.6 and 37.8 eV are attributable to W<sup>6+</sup>, which accord with the bond valence sum (BVS) calculations.<sup>7</sup> The Fe 2p (Fig. S13d) spectra appear four classic peaks pick at 728.8, 724.2, 714.9 and 796 eV, which of the peaks at 728.8 and 714.9 eV can indicate the presence of Fe<sup>3+</sup>, other pick at 710.7 and 724.2 eV are attributed to the exist of Fe<sup>2+</sup>.<sup>8</sup>

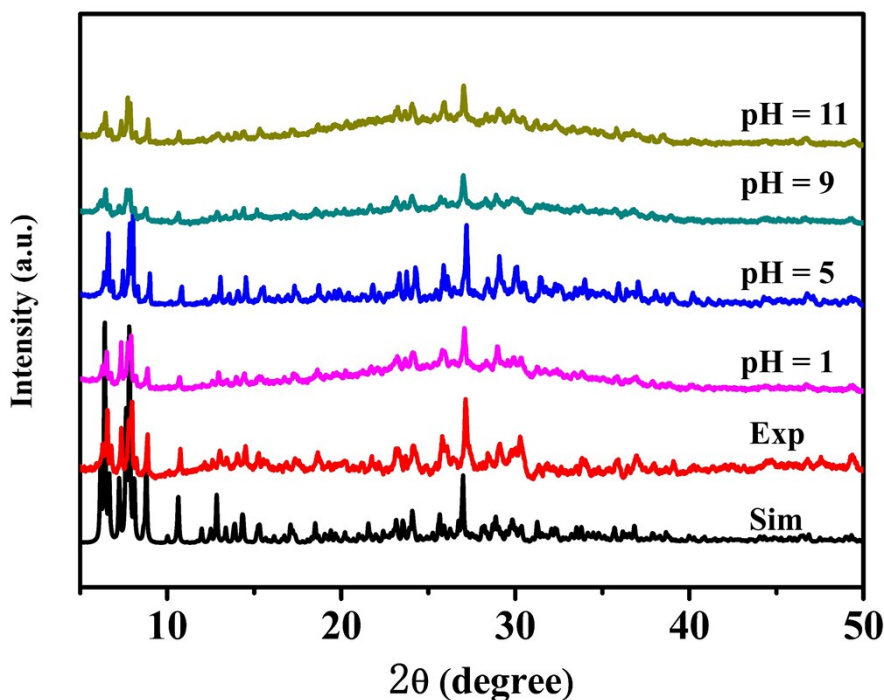

**Fig. S14** The PXRD patterns of **1** immersed in water at room temperature for 4 h at different pH. Sim represents the simulated pattern and Exp represents the pattern of as-synthesized sample, respectively.

## Section 4 Additional performance studies

### I. Electrochemical experiment

Electrochemical measurements were recorded on a CHI760 Electrochemical workstation. A conventional three-electrode cell was used at room temperature. The compound **1** bulk-modified carbon-paste electrode (CPE) was used as the working electrodes. An Ag/AgCl and a platinum wire were used as reference and auxiliary electrodes, respectively.

The electrochemical properties of compound **1** bulk-modified glassy carbon electrode (GCE) were tested in 1 mol L<sup>-1</sup> H<sub>2</sub>SO<sub>4</sub> aqueous solution at different scanning speeds. As shown in the Fig. S15, **1**-CPE display three pairs of reversible redox peaks in the potential range of -1 to 0.4 V, and the mean peak potentials  $E_{1/2} = 0.5(E_{pa} + E_{pc})$  are -0.552 V (I-I'), -0.262 V (II-II'), 0.122V (III-III') (200 mV s<sup>-1</sup>), which due to the two-electron redox processes of W centers of {Fe<sub>10</sub>P<sub>4</sub>W<sub>32</sub>} unit of **1**.<sup>9</sup> Furthermore, as the scan rate increases (from 100 to 400 mV s<sup>-1</sup>), the cathodic peak potentials move to the negative direction and the corresponding anodic peak potentials shift to the positive orientation at the same time. In addition, the peak current has a linear relationship with the scanning rate up to 400 mV s<sup>-1</sup>, which manifest that the redox process of **1**-GCEs is surface-controlled.<sup>10</sup>

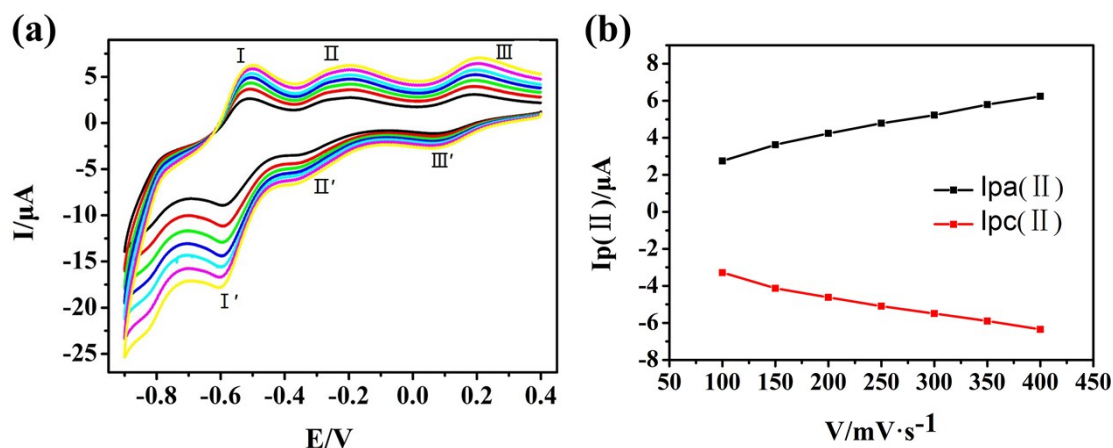

**Fig. S15** (a) Cyclic voltammograms of the **1**-CPE in 1 mol L<sup>-1</sup> H<sub>2</sub>SO<sub>4</sub> aqueous solution at different scanning speeds (from inner to outer: 100, 150, 200, 250, 300, 350, 400 mV s<sup>-1</sup>). (b) The plots and linear fits of the anodic and the cathodic peaks currents against scan rates for **1**-CPE.

## II. Magnetic measurement

The variable magnetic susceptibility data was recorded on a Quantum Design MPMS SQUID magnetometer. The variable-temperature magnetic susceptibilities ( $\chi_M T$ -T) for complexes **1** were measured from 2–300 K under a constant magnetic field of 1.0 KOe. As shown in the Fig. S16a, at 300K, the  $\chi_M T$  value of compound **1** was 37.2 cm<sup>3</sup> K mol<sup>-1</sup>, which is slightly larger than the theoretical value of 35.5 cm<sup>3</sup> K mol<sup>-1</sup> from four isolated Fe<sup>III</sup> ions ( $S = 5/2$ ,  $g = 2$ ) and six isolated Fe<sup>II</sup> ions ( $S = 2$ ,  $g = 2$ ). Upon cooling, the value of  $\chi_M T$  decreases slowly and reaches a value of 11.22 cm<sup>3</sup> K mol<sup>-1</sup> at 2 K. The downward trend of  $\chi_M T$  value with decreasing temperature indicates the existence of antiferromagnetic interaction among iron ions in compound **1**.<sup>11</sup> As shown in the Fig. S16b, the  $\chi_M^{-1}$  data of **1** accord with Curie–Weiss law [ $\chi_M = C/(T-\theta)$ ] in the range of 2-300 K. By fitting calculation, we can obtain the Curie constant  $C = 37.899$  cm<sup>3</sup> and Weiss constant  $\theta = -10.251$  K, and the minus Weiss constant further proving the existence of antiferromagnetic interaction in the compound **1**.

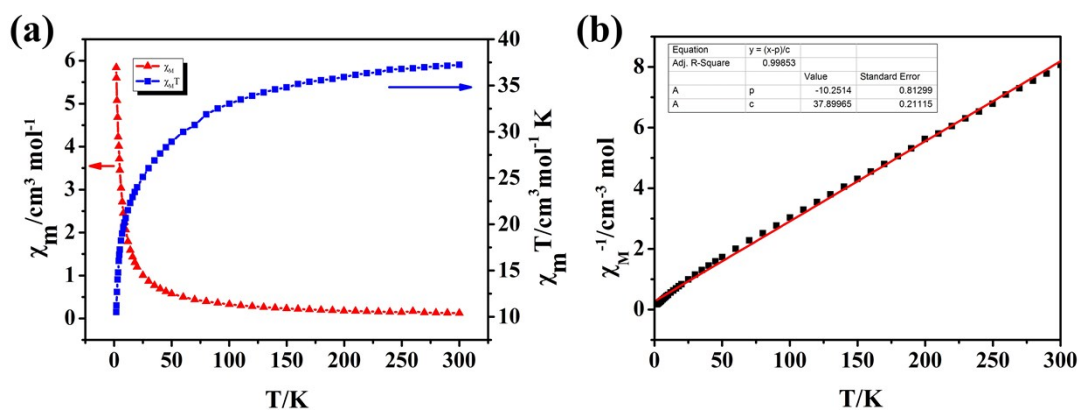

**Fig. S16** (a) The  $\chi_M$  and  $\chi_{MT}$  versus temperature from 2-300 K under 1.0 KOe dc field. (b) The reciprocal magnetic susceptibility  $\chi_M^{-1}$  versus temperature for compound **1**

### III. Electrocatalytic activities experiment

All electrocatalytic measurements were carried out on a ZAHNER IM6ex electrochemical workstation at room temperature under the air atmosphere. In a standard three-electrode cell, the working electrodes were the carbon paste electrode (CPE, 3 mm diameter), a platinum gauze (10 mm  $\times$  10 mm) was used as the counter electrode and an Ag/AgCl electrode was the reference electrode. Cyclic voltammetry experiments were carried out in 50 mM Na<sub>2</sub>HPO<sub>4</sub> + NaH<sub>2</sub>PO<sub>4</sub> buffer (pH = 6.8) with different contents of Fe<sub>10</sub>P<sub>4</sub>W<sub>32</sub>.

100 mg graphite powder (XC-72) and m g sample Fe<sub>10</sub>P<sub>4</sub>W<sub>32</sub> (m = 10 mg, 20 mg and 40 mg, respectively) were mixed according to the mass ratio of 1:0.1, 1:0.2, 1:0.4, and grinded in an agate mortar for 20 minutes, producing a uniform dry mixture. Then 0.1 ml paraffin was added. Finally, the mixture was packed into a glass tube (3 mm diameter) and compacted gently from behind with copper rods, manufacturing CPEs of Fe<sub>10</sub>P<sub>4</sub>W<sub>32</sub>-C 10%, Fe<sub>10</sub>P<sub>4</sub>W<sub>32</sub>-C 20% and Fe<sub>10</sub>P<sub>4</sub>W<sub>32</sub>-C 40%.

**Table S2** The different current density versus overpotential of CPEs with different **1** contents.

|                                           | Fe <sub>10</sub> P <sub>4</sub> W <sub>32</sub><br>(0%) | Fe <sub>10</sub> P <sub>4</sub> W <sub>32</sub><br>(10%) | Fe <sub>10</sub> P <sub>4</sub> W <sub>32</sub><br>(20%) | Fe <sub>10</sub> P <sub>4</sub> W <sub>32</sub><br>(40%) |
|-------------------------------------------|---------------------------------------------------------|----------------------------------------------------------|----------------------------------------------------------|----------------------------------------------------------|
| Current Density<br>(mA cm <sup>-2</sup> ) | Overpotential<br>(mV)                                   |                                                          |                                                          |                                                          |
| 0.2                                       | 262                                                     | 229                                                      | 159                                                      | 118                                                      |
| 0.3                                       | 330                                                     | 266                                                      | 202                                                      | 160                                                      |

### IV. Nonlinear optical experiment

Two-photon absorption (TPA) cross-sections ( $\sigma$ ) were obtained by using Chameleon II femtosecond laser pulse and Ti: 95 sapphire systems.

The electronic spectra of compound **1** and **2** in DMSO solution at a concentration of  $1.0 \times 10^{-3}$  mol L<sup>-1</sup> give the nonlinear absorption at room temperature. Two-photon absorption (TPA) values containing TPA coefficient  $\beta$  and TPA cross section  $\sigma$  were measured by the open-aperture Z-scan technique with femtosecond laser pulse and Ti:95 sapphire system. Fig. S17 shows the open aperture Z-scan curves of **1** and **2**. The black dots are the experimental data, and the red lines represent the theoretical simulated curves modified by the following equations (eqn (1) and (2)):<sup>12</sup>

$$T(z, s = 1) = \sum_{m=0}^{\infty} \frac{[-q_0(z)]^m}{(m+1)^{3/2}} \quad \text{for } |q_0| < 1 \quad (1)$$

$$q_0(z) = \frac{\beta I_0 L_{eff}}{1 + z^2 / z_0^2} \quad (2)$$

where  $\beta$  is the TPA coefficient of the solution,  $I_0$  is the input intensity of laser beam at the focus  $z = 0$ ,  $L_{eff} = (1 - e^{-\alpha L})/\alpha$  is the effective length with  $\alpha$  and  $L$  are the linear absorption coefficient and the sample length respectively.  $Z$  is the sample position,  $z_0 = \pi\omega_0^2/\lambda$  is the diffraction length of the beam, in which the  $\omega_0$  and  $\lambda$  are the spot size at the focus and the wavelength of the beam respectively. Furthermore, the molecular TPA cross section  $\sigma$  can be calculated by the following relationship:

$$\sigma N_A d \times 10^{-3} = h\nu\beta \quad (3)$$

where  $N_A$ ,  $d$ ,  $h$  and  $\nu$  are respectively the Avogadro's constant, the concentration of the compound, the Planck's constant and the frequency of input intensity.

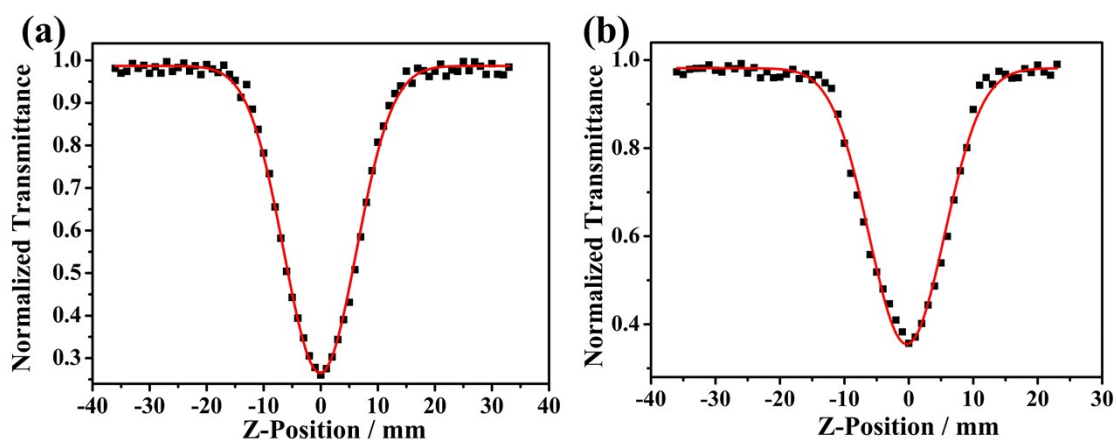

**Fig. S17** Z-scan data for compound **1** (a) and compound **2** (b) in DMSO solution at a concentration of  $1.0 \times 10^{-3} \text{ mol L}^{-1}$  obtained by open aperture Z-scan method.

The particle size of compound **1** in solution was determined by Nano laser particle size analyzer. A mixture of 3.2 mg compound **1** and 3 ml DMF solvent was ultrasonic for 0.5 h to obtain a suspension with a concentration of 1%. Then, the suspension was centrifuged to acquire a supernatant.

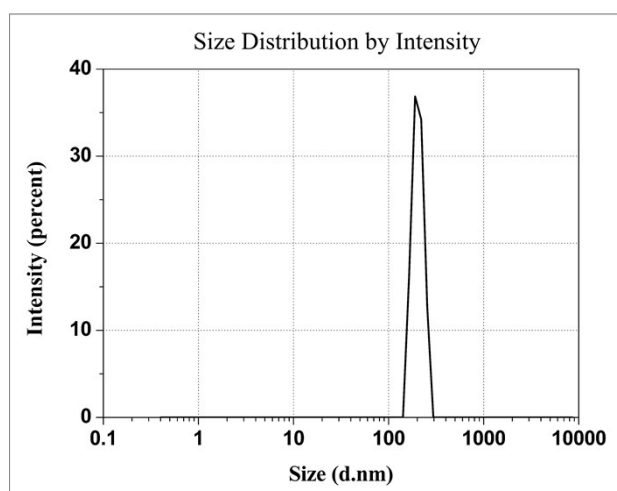

**Fig. S18** The particle size of compound **1** in solution

As shown in the figure above, the measured particle size in DMF solvent is about 170 nm, which is much larger than the 3.9 nm. That is mainly due to many cluster anions of compound **1** in DMF solvent self-assemble into large particles (a single-layer, hollow spherical "blackberry" structure) with large size. [1]

[1] (a) P. C. Yin, D. Li and T. B. Liu, *Chem. Soc. Rev.*, 2012, **41**, 7368. (b) T. B. Liu, Melissa L. K. Langston, D. Li, J. M. Pigga, C. Pichon, A. M. Todea and A. Müller, *Science*, 2011, **331**, 1590.

**Table S3.** The third-order NLO data of some POMs-based compound.

| Compounds                                                                                                                                                                                                                                                                                                                           | $\beta^a$ (cm·GM <sup>-1</sup> ) | $\sigma^b$ (GM) | $\lambda$ (nm) | ref       |
|-------------------------------------------------------------------------------------------------------------------------------------------------------------------------------------------------------------------------------------------------------------------------------------------------------------------------------------|----------------------------------|-----------------|----------------|-----------|
| [Na(H <sub>2</sub> O)Fe <sup>II</sup> (H <sub>2</sub> O) <sub>2</sub> (DAPSC)] <sub>2</sub><br>{[Fe <sup>II</sup> (H <sub>2</sub> O)(DAPSC)] <sub>2</sub> [Fe <sup>II</sup> (H <sub>2</sub> O) <sub>4</sub> ] <sub>2</sub> [Na <sub>2</sub> Fe <sup>III</sup> P <sub>4</sub> W <sub>32</sub> O <sub>120</sub> ]}·25H <sub>2</sub> O | 0.04354                          | 2053            | 700            | This work |
| O<br>[Fe <sup>II</sup> (H <sub>2</sub> O) <sub>2</sub> (DAPSC)] <sub>2</sub> {[Fe <sup>III</sup> (H <sub>2</sub> O)(DAPSC)] <sub>2</sub> [Fe <sup>III</sup> <sub>4</sub> (H <sub>2</sub> O) <sub>2</sub> MoW <sub>18</sub> O <sub>68</sub> ]}·29H <sub>2</sub> O                                                                    | 0.02439                          | 1150            | 700            |           |
| [(L-C <sub>4</sub> O <sub>6</sub> H <sub>2</sub> ) <sub>2</sub> V <sub>4</sub> O <sub>8</sub> ] <sub>2</sub> ·2C <sub>6</sub> N <sub>2</sub> H <sub>18</sub>                                                                                                                                                                        | 0.003167                         | 1412            | 740            | 1         |
| [(D-C <sub>4</sub> O <sub>6</sub> H <sub>2</sub> ) <sub>2</sub> V <sub>4</sub> O <sub>8</sub> ] <sub>2</sub> ·2C <sub>6</sub> N <sub>2</sub> H <sub>18</sub>                                                                                                                                                                        | 0.003167                         | 1094            | 740            | 1         |
| [Co(H <sub>2</sub> O) <sub>2</sub> (DAPSC)] <sub>3</sub> {[Co(H <sub>2</sub> O)(DAPSC)] <sub>2</sub> BW <sub>12</sub> O <sub>40</sub> }BW <sub>12</sub> O <sub>40</sub><br>·10H <sub>2</sub> O                                                                                                                                      | 0.003553                         | 1522            | 720            | 2         |
| [Zn(H <sub>2</sub> O) <sub>2</sub> (DAPSC)] <sub>3</sub> {[Zn(H <sub>2</sub> O)(DAPSC)] <sub>2</sub> BW <sub>12</sub> O <sub>40</sub> }BW <sub>12</sub> O <sub>40</sub><br>·8H <sub>2</sub> O                                                                                                                                       | 0.005132                         | 2199            | 720            | 2         |
| Na <sub>2</sub> [(CH <sub>3</sub> ) <sub>2</sub> NH <sub>2</sub> ] <sub>3</sub> {Na[Ce <sup>III</sup> (H <sub>2</sub> O)(CH <sub>3</sub> CH <sub>2</sub> OH)(L-tartH <sub>3</sub> )(H <sub>2</sub> Si <sub>2</sub> W <sub>19</sub> O <sub>66</sub> )]} <sub>2</sub> ·3.5H <sub>2</sub> O                                            | 0.01369                          | 389             | 740            | 3         |
| [(CH <sub>3</sub> ) <sub>2</sub> NH <sub>2</sub> ] <sub>7</sub> {Na[Ce <sup>III</sup> (H <sub>2</sub> O)(CH <sub>3</sub> CH <sub>2</sub> OH)(D-tartH <sub>3</sub> )(Si <sub>2</sub> W <sub>19</sub> O <sub>66</sub> )]} <sub>2</sub> ·2.5H <sub>2</sub> O                                                                           | 0.00279                          | 392             | 740            | 3         |
| [Mn(H <sub>2</sub> O) <sub>2</sub> (DAPSC)] <sub>2</sub> {[Na <sub>3</sub> (H <sub>2</sub> O) <sub>2</sub> Mn <sub>0.5</sub> (H <sub>2</sub> O) <sub>4</sub> ][Mn(H <sub>2</sub> O)(DAPSC)] <sub>2</sub> [H <sub>3</sub> P <sub>5</sub> W <sub>30</sub> O <sub>110</sub> ]}·7.5H <sub>2</sub> O                                     | 0.002099                         | 888             | 780            | 4         |
| [Co(H <sub>2</sub> O) <sub>2</sub> (DAPSC)] <sub>3</sub> {[Co(H <sub>2</sub> O) <sub>2</sub> (DAPSC)] <sub>2</sub> [Na <sub>1.5</sub> (H <sub>2</sub> O) <sub>2</sub> ]}{[Na <sub>0</sub>                                                                                                                                           |                                  |                 |                |           |

|                                                                                                                                                                                                                                                                                         |          |      |     |   |
|-----------------------------------------------------------------------------------------------------------------------------------------------------------------------------------------------------------------------------------------------------------------------------------------|----------|------|-----|---|
| $5(\text{H}_2\text{O})_2\text{Co}_{0.5}(\text{H}_2\text{O})_4[\text{Co}(\text{H}_2\text{O})(\text{DAPSC})]_2[\text{H}_4\text{P}_5\text{W}_{30}\text{O}_{110}] \cdot 6\text{H}_2\text{O}$                                                                                                | 0.001715 | 707  | 800 | 4 |
| $[\text{Ni}(\text{NTB})(\text{H}_2\text{O})]_2(\text{H}_2\text{P}_2\text{Mo}_5\text{O}_{23}) \cdot 9.25\text{H}_2\text{O}$                                                                                                                                                              | 0.001655 | 758  | 720 | 5 |
| $[\text{Ni}(\text{H}_2\text{O})(\text{NTB})]_2(\text{PMo}^{\text{VI}}_{11}\text{Mo}^{\text{VO}}_{40}) \cdot 4.5\text{H}_2\text{O}$                                                                                                                                                      | 0.001127 | 404  | 920 | 5 |
| $[\text{Ni}(\text{NTB})]_2(\text{Mo}_8\text{O}_{26}) \cdot 9\text{H}_2\text{O}$                                                                                                                                                                                                         | 0.015925 | 673  | 780 | 5 |
| $[\text{Co}(\text{H}_2\text{O})_6] \{ [\text{C}_3\text{H}_4\text{N}_2]_2 [\text{C}_5\text{NH}_5]_{14} [\text{H}_{15}(\text{Mo}_2\text{O}_4)_8\text{Co}_{16}(\text{PO}_4)_{14}(\text{HPO}_3)_{10}(\text{OH})_3] \} \cdot 5\text{H}_2\text{O}$                                            | 0.01375  | 622  | 730 | 6 |
| $[\text{C}_3\text{H}_5\text{N}_2]_4 [\text{C}_5\text{NH}_5]_2 [\text{Ni}(\text{H}_2\text{O})_6] \{ [\text{C}_3\text{H}_4\text{N}_2]_2 [\text{C}_5\text{NH}_5]_{14} [\text{H}_{18}(\text{Mo}_2\text{O}_4)_8\text{Ni}_{16}(\text{PO}_4)_{22}(\text{OH})_6] \} \cdot 11\text{H}_2\text{O}$ | 0.0056   | 274  | 750 | 6 |
| $[\text{C}_5\text{NH}_5]_8 [\text{C}_3\text{H}_5\text{N}_2]_2 \{ [\text{C}_5\text{NH}_5]_9 [\text{H}_{31}\text{Mo}_{12}\text{O}_{24}\text{Co}_{12}(\text{PO}_4)_{23}(\text{H}_2\text{O})_4] \} \cdot 12\text{H}_2\text{O}$                                                              | 0.00263  | 1058 | 820 | 7 |
| $[\text{Sm}(\text{H}_2\text{O})_2(\text{DAPSC})]_2 [\text{Sm}(\text{H}_2\text{O})_3(\text{DAPSC})]_2 [(\text{SiW}_{12}\text{O}_{40})]_3 \cdot 15\text{H}_2\text{O}$                                                                                                                     | 0.021047 | 1383 | 680 | 8 |
| O                                                                                                                                                                                                                                                                                       |          |      |     |   |
| $[\text{Eu}(\text{H}_2\text{O})_2(\text{DAPSC})]_2 [\text{Eu}(\text{H}_2\text{O})_3(\text{DAPSC})]_2 [(\text{SiW}_{12}\text{O}_{40})]_3 \cdot 15\text{H}_2\text{O}$                                                                                                                     | 0.013874 | 669  | 700 | 8 |
| $[\text{Tb}(\text{H}_2\text{O})_2(\text{DAPSC})]_2 [\text{Tb}(\text{H}_2\text{O})_3(\text{DAPSC})]_2 [(\text{SiW}_{12}\text{O}_{40})]_3 \cdot 15\text{H}_2\text{O}$                                                                                                                     | 0.011443 | 712  | 720 | 8 |

<sup>a</sup> TPA absorption coefficient of the solution. <sup>b</sup> molecular TPA cross-section.

**Table S4.** BVS analysis of compound **1** for iron atom

| BVP         | S      | BVP         | S      | BVP           | S      |
|-------------|--------|-------------|--------|---------------|--------|
| Fe(1)-O(61) | 0.3111 | Fe(2)-O(31) | 0.3894 | Fe(3)-O(4W)   | 0.4469 |
| Fe(1)-O(2)  | 0.2876 | Fe(2)-O(3W) | 0.3769 | Fe(3)-O(60)   | 0.3947 |
| Fe(1)-N(10) | 0.3523 | Fe(2)-O(66) | 0.3533 | Fe(3)-O(58)#1 | 0.3852 |
| Fe(1)-O(1W) | 0.2838 | Fe(2)-N(4)  | 0.3679 | Fe(3)-O(5W)   | 0.3401 |
| Fe(1)-N(11) | 0.3411 | Fe(2)-N(3)  | 0.3356 | Fe(3)-O(7W)   | 0.2846 |
| Fe(1)-N(12) | 0.3329 | Fe(2)-N(5)  | 0.3240 | Fe(3)-O(6W)   | 0.2554 |
| Fe(1)-O(2W) | 0.2718 | Fe(2)-O(63) | 0.2610 |               |        |
| BVS         | 2.1806 |             | 2.4080 |               | 2.1069 |

**Table S5.** BVS analysis of compound **2** for iron atom

| BVP           | S      | BVP           | S      | BVP         | S      | BVP         | S      |
|---------------|--------|---------------|--------|-------------|--------|-------------|--------|
| Fe(1)-O(5)#1  | 0.6299 | Fe(2)-O(23)   | 0.5473 | Fe(3)-O(11) | 0.4121 | Fe(3)-N(5)  | 0.4679 |
| Fe(1)-O(4)    | 0.6265 | Fe(2)-O(30)   | 0.5385 | Fe(3)-O(2W) | 0.3719 | Fe(4)-O(3W) | 0.3476 |
| Fe(1)-O(12)#1 | 0.4530 | Fe(2)-O(2)    | 0.5020 | Fe(3)-O(39) | 0.3457 | Fe(4)-O(4W) | 0.3231 |
| Fe(1)-O(2)#1  | 0.4143 | Fe(2)-O(1W)   | 0.4591 | Fe(3)-O(37) | 0.3145 | Fe(4)-O(36) | 0.2940 |
| Fe(1)-O(13)   | 0.4077 | Fe(2)-O(12)#1 | 0.4469 | Fe(3)-N(3)  | 0.3883 | Fe(4)-O(38) | 0.2800 |
| Fe(1)-O(2)    | 0.4066 | Fe(2)-O(13)#1 | 0.4409 | Fe(3)-N(4)  | 0.3841 | Fe(4)-N(11) | 0.3365 |
|               |        |               |        | Fe(3)-N(5)  | 0.3810 | Fe(4)-N(10) | 0.3338 |
| BVS           | 2.9380 |               | 2.9348 |             | 2.5977 |             | 2.3828 |

---

## Section 5 The Selected bonds lengths and angles

**Table S6.** Selected bonds lengths (Å) and angles (°) for compound **1**.

|            |           |              |           |
|------------|-----------|--------------|-----------|
| W(1)-O(16) | 1.735(10) | W(14)-O(38)  | 1.817(10) |
| W(1)-O(59) | 1.870(9)  | W(14)-O(30)  | 2.022(9)  |
| W(1)-O(22) | 1.877(10) | W(14)-O(65)  | 2.027(10) |
| W(1)-O(1)  | 1.931(11) | W(14)-O(24)  | 2.363(9)  |
| W(1)-O(28) | 1.936(9)  | W(15)-O(15)  | 1.825(9)  |
| W(1)-O(54) | 2.370(9)  | W(15)-O(5)#1 | 1.841(10) |
| W(2)-O(45) | 1.706(10) | W(15)-O(37)  | 1.851(10) |
| W(2)-O(7)  | 1.879(10) | W(15)-O(6)   | 2.028(9)  |
| W(2)-O(28) | 1.899(10) | W(15)-O(33)  | 2.113(10) |
| W(2)-O(52) | 1.915(10) | W(15)-O(43)  | 2.269(9)  |
| W(2)-O(12) | 1.924(10) | W(16)-O(5)   | 1.826(10) |
| W(2)-O(54) | 2.385(9)  | W(16)-O(9)   | 1.841(9)  |
| W(3)-O(50) | 1.704(11) | W(16)-O(4)   | 1.845(10) |
| W(3)-O(56) | 1.878(10) | W(16)-O(39)  | 2.024(9)  |
| W(3)-O(34) | 1.884(10) | W(16)-O(41)  | 2.115(9)  |
| W(3)-O(57) | 1.933(10) | W(16)-O(36)  | 2.303(9)  |
| W(3)-O(32) | 1.951(9)  | W(17)-O(4)   | 1.818(10) |
| W(3)-O(14) | 2.412(9)  | W(17)-O(15)  | 1.840(9)  |
| W(4)-O(48) | 1.706(10) | W(17)-O(3)   | 1.844(9)  |
| W(4)-O(42) | 1.876(10) | W(17)-O(20)  | 1.999(9)  |
| W(4)-O(25) | 1.902(10) | W(17)-O(21)  | 2.094(10) |
| W(4)-O(29) | 1.924(10) | W(17)-O(46)  | 2.311(9)  |
| W(4)-O(7)  | 1.925(10) | W(18)-O(37)  | 1.802(10) |
| W(4)-O(49) | 2.344(9)  | W(18)-O(9)   | 1.813(9)  |
| W(5)-O(31) | 1.714(10) | W(18)-O(3)#1 | 1.823(10) |
| W(5)-O(17) | 1.834(10) | W(18)-O(17)  | 2.009(9)  |
| W(5)-O(52) | 1.889(10) | W(18)-O(38)  | 2.092(10) |
| W(5)-O(27) | 1.886(9)  | W(18)-O(64)  | 2.290(9)  |
| W(5)-O(18) | 1.972(10) | Fe(4)-O(15)  | 1.825(9)  |
| W(5)-O(64) | 2.341(9)  | Fe(4)-O(5)#1 | 1.841(10) |
| W(6)-O(51) | 1.743(10) | Fe(4)-O(37)  | 1.851(10) |
| W(6)-O(10) | 1.861(10) | Fe(4)-O(6)   | 2.028(9)  |
| W(6)-O(1)  | 1.872(10) | Fe(4)-O(33)  | 2.113(10) |
| W(6)-O(57) | 1.905(10) | Fe(4)-O(43)  | 2.269(9)  |
| W(6)-O(29) | 1.940(10) | Fe(5)-O(5)   | 1.826(10) |
| W(6)-O(49) | 2.398(10) | Fe(5)-O(9)   | 1.841(9)  |
| W(7)-O(13) | 1.714(9)  | Fe(5)-O(4)   | 1.845(10) |
| W(7)-O(39) | 1.825(9)  | Fe(5)-O(39)  | 2.024(9)  |



|                    |           |                  |           |
|--------------------|-----------|------------------|-----------|
| W(7)-O(8)          | 1.865(10) | Fe(5)-O(41)      | 2.115(9)  |
| W(7)-O(59)         | 1.934(9)  | Fe(5)-O(36)      | 2.303(9)  |
| W(7)-O(11)         | 1.963(9)  | Fe(6)-O(4)       | 1.818(10) |
| W(7)-O(36)         | 2.377(9)  | Fe(6)-O(15)      | 1.840(9)  |
| W(8)-O(44)         | 1.707(10) | Fe(6)-O(3)       | 1.844(9)  |
| W(8)-O(20)         | 1.878(9)  | Fe(6)-O(20)      | 1.999(9)  |
| W(8)-O(8)          | 1.919(10) | Fe(6)-O(21)      | 2.094(10) |
| W(8)-O(10)         | 1.943(10) | Fe(6)-O(46)      | 2.311(9)  |
| W(8)-O(34)         | 1.945(10) | Fe(7)-O(37)      | 1.802(10) |
| W(8)-O(46)         | 2.390(9)  | Fe(7)-O(9)       | 1.813(9)  |
| W(9)-O(47)         | 1.722(10) | Fe(7)-O(3)#1     | 1.823(10) |
| W(9)-O(30)         | 1.868(10) | Fe(7)-O(17)      | 2.009(9)  |
| W(9)-O(18)         | 1.875(10) | Fe(7)-O(38)      | 2.092(10) |
| W(9)-O(12)         | 1.906(10) | Fe(7)-O(64)      | 2.290(9)  |
| W(9)-O(23)         | 1.940(10) | P(1)-O(54)       | 1.527(10) |
| W(9)-O(24)         | 2.397(8)  | P(1)-O(36)       | 1.536(9)  |
| W(10)-O(35)        | 1.719(11) | P(1)-O(64)       | 1.543(9)  |
| W(10)-O(62)        | 1.871(9)  | P(1)-O(24)       | 1.573(10) |
| W(10)-O(26)        | 1.884(10) | P(2)-O(49)       | 1.517(10) |
| W(10)-O(32)        | 1.918(9)  | P(2)-O(46)       | 1.516(10) |
| W(10)-O(25)        | 1.944(10) | P(2)-O(43)       | 1.552(10) |
| W(10)-O(14)        | 2.405(10) | P(2)-O(14)       | 1.559(10) |
| W(11)-O(40)        | 1.724(10) | Fe(1)-O(61)      | 2.166(11) |
| W(11)-O(6)         | 1.847(9)  | Fe(1)-O(2)       | 2.195(12) |
| W(11)-O(42)        | 1.908(10) | Fe(1)-N(10)      | 2.192(14) |
| W(11)-O(27)        | 1.937(10) | Fe(1)-O(1W)      | 2.200(13) |
| W(11)-O(26)        | 1.957(10) | Fe(1)-N(11)      | 2.204(13) |
| W(11)-O(43)        | 2.363(9)  | Fe(1)-N(12)      | 2.213(13) |
| W(12)-O(19)        | 1.713(11) | Fe(1)-O(2W)      | 2.216(12) |
| W(12)-O(65)        | 1.846(10) | Fe(2)-O(31)      | 2.083(10) |
| W(12)-O(11)        | 1.874(9)  | Fe(2)-O(3W)      | 2.095(13) |
| W(12)-O(23)        | 1.954(9)  | Fe(2)-O(66)      | 2.119(11) |
| W(12)-O(22)        | 1.958(10) | Fe(2)-N(4)       | 2.176(14) |
| W(12)-O(24)        | 2.413(9)  | Fe(2)-N(3)       | 2.210(15) |
| W(13)-O(60)        | 1.731(10) | Fe(2)-N(5)       | 2.223(14) |
| W(13)-O(21)        | 1.764(10) | Fe(2)-O(63)      | 2.231(11) |
| W(13)-O(33)        | 1.814(9)  | Fe(3)-O(4W)      | 2.032(12) |
| W(13)-O(56)        | 2.006(10) | Fe(3)-O(60)      | 2.078(10) |
| W(13)-O(62)        | 2.014(10) | Fe(3)-O(58)#1    | 2.087(11) |
| W(13)-O(14)        | 2.350(9)  | Fe(3)-O(5W)      | 2.133(12) |
| W(14)-O(58)        | 1.730(11) | Fe(3)-O(7W)      | 2.199(13) |
| W(14)-O(41)        | 1.790(9)  | Fe(3)-O(6W)      | 2.239(12) |
| O(15)-Fe(4)-O(5)#1 | 103.9(4)  | O(61)-Fe(1)-O(2) | 75.6(4)   |

|                    |          |                     |          |
|--------------------|----------|---------------------|----------|
| O(15)-Fe(4)-O(37)  | 95.5(4)  | O(61)-Fe(1)-N(10)   | 71.2(5)  |
| O(5)#1-Fe(4)-O(37) | 99.6(4)  | O(2)-Fe(1)-N(10)    | 146.7(5) |
| O(15)-Fe(4)-O(6)   | 159.0(4) | O(61)-Fe(1)-O(1W)   | 86.0(5)  |
| O(5)#1-Fe(4)-O(6)  | 95.0(4)  | O(2)-Fe(1)-O(1W)    | 90.8(5)  |
| O(37)-Fe(4)-O(6)   | 90.1(4)  | N(10)-Fe(1)-O(1W)   | 88.8(5)  |
| O(15)-Fe(4)-O(33)  | 85.9(4)  | O(61)-Fe(1)-N(11)   | 141.5(4) |
| O(5)#1-Fe(4)-O(33) | 89.7(4)  | O(2)-Fe(1)-N(11)    | 142.9(5) |
| O(37)-Fe(4)-O(33)  | 169.9(4) | N(10)-Fe(1)-N(11)   | 70.4(5)  |
| O(6)-Fe(4)-O(33)   | 85.1(4)  | O(1W)-Fe(1)-N(11)   | 91.5(5)  |
| O(15)-Fe(4)-O(43)  | 85.6(4)  | O(61)-Fe(1)-N(12)   | 147.9(5) |
| O(5)#1-Fe(4)-O(43) | 167.2(4) | O(2)-Fe(1)-N(12)    | 72.4(5)  |
| O(37)-Fe(4)-O(43)  | 87.7(4)  | N(10)-Fe(1)-N(12)   | 140.9(5) |
| O(6)-Fe(4)-O(43)   | 74.4(4)  | O(1W)-Fe(1)-N(12)   | 91.7(5)  |
| O(33)-Fe(4)-O(43)  | 82.4(3)  | N(11)-Fe(1)-N(12)   | 70.5(5)  |
| O(5)-Fe(5)-O(9)    | 99.7(4)  | O(61)-Fe(1)-O(2W)   | 92.0(4)  |
| O(5)-Fe(5)-O(4)    | 97.8(4)  | O(2)-Fe(1)-O(2W)    | 89.2(4)  |
| O(9)-Fe(5)-O(4)    | 97.1(4)  | N(10)-Fe(1)-O(2W)   | 90.0(5)  |
| O(5)-Fe(5)-O(39)   | 101.8(4) | O(1W)-Fe(1)-O(2W)   | 177.9(5) |
| O(9)-Fe(5)-O(39)   | 156.3(4) | N(11)-Fe(1)-O(2W)   | 89.8(5)  |
| O(4)-Fe(5)-O(39)   | 89.8(4)  | N(12)-Fe(1)-O(2W)   | 90.3(5)  |
| O(5)-Fe(5)-O(41)   | 92.2(4)  | O(31)-Fe(2)-O(3W)   | 171.6(5) |
| O(9)-Fe(5)-O(41)   | 86.2(4)  | O(31)-Fe(2)-O(66)   | 86.6(4)  |
| O(4)-Fe(5)-O(41)   | 168.7(4) | O(3W)-Fe(2)-O(66)   | 85.5(5)  |
| O(39)-Fe(5)-O(41)  | 83.1(4)  | O(31)-Fe(2)-N(4)    | 94.5(5)  |
| O(5)-Fe(5)-O(36)   | 172.4(4) | O(3W)-Fe(2)-N(4)    | 93.4(5)  |
| O(9)-Fe(5)-O(36)   | 83.8(4)  | O(66)-Fe(2)-N(4)    | 140.4(5) |
| O(4)-Fe(5)-O(36)   | 88.3(4)  | O(31)-Fe(2)-N(3)    | 86.6(5)  |
| O(39)-Fe(5)-O(36)  | 73.7(3)  | O(3W)-Fe(2)-N(3)    | 93.4(5)  |
| O(41)-Fe(5)-O(36)  | 81.3(3)  | O(66)-Fe(2)-N(3)    | 70.8(5)  |
| O(4)-Fe(6)-O(15)   | 97.1(4)  | N(4)-Fe(2)-N(3)     | 69.8(5)  |
| O(4)-Fe(6)-O(3)    | 99.6(4)  | O(31)-Fe(2)-N(5)    | 96.7(5)  |
| O(15)-Fe(6)-O(3)   | 99.3(4)  | O(3W)-Fe(2)-N(5)    | 88.8(5)  |
| O(4)-Fe(6)-O(20)   | 90.1(4)  | O(66)-Fe(2)-N(5)    | 149.3(5) |
| O(15)-Fe(6)-O(20)  | 157.1(4) | N(4)-Fe(2)-N(5)     | 69.9(5)  |
| O(3)-Fe(6)-O(20)   | 100.8(4) | N(3)-Fe(2)-N(5)     | 139.8(5) |
| O(4)-Fe(6)-O(21)   | 168.3(4) | O(31)-Fe(2)-O(63)   | 88.1(4)  |
| O(15)-Fe(6)-O(21)  | 86.0(4)  | O(3W)-Fe(2)-O(63)   | 87.8(5)  |
| O(3)-Fe(6)-O(21)   | 91.0(4)  | O(66)-Fe(2)-O(63)   | 79.5(4)  |
| O(20)-Fe(6)-O(21)  | 83.0(4)  | N(4)-Fe(2)-O(63)    | 140.0(5) |
| O(4)-Fe(6)-O(46)   | 88.9(4)  | N(3)-Fe(2)-O(63)    | 150.1(5) |
| O(15)-Fe(6)-O(46)  | 83.9(4)  | N(5)-Fe(2)-O(63)    | 70.1(5)  |
| O(3)-Fe(6)-O(46)   | 170.4(4) | O(4W)-Fe(3)-O(60)   | 175.2(5) |
| O(20)-Fe(6)-O(46)  | 74.5(3)  | O(4W)-Fe(3)-O(58)#1 | 92.7(5)  |

|                    |          |                     |          |
|--------------------|----------|---------------------|----------|
| O(21)-Fe(6)-O(46)  | 80.2(4)  | O(60)-Fe(3)-O(58)#1 | 92.0(4)  |
| O(37)-Fe(7)-O(9)   | 95.7(4)  | O(4W)-Fe(3)-O(5W)   | 89.3(5)  |
| O(37)-Fe(7)-O(3)#1 | 97.0(4)  | O(60)-Fe(3)-O(5W)   | 89.2(4)  |
| O(9)-Fe(7)-O(3)#1  | 104.1(4) | O(58)#1-Fe(3)-O(5W) | 96.1(4)  |
| O(37)-Fe(7)-O(17)  | 91.2(4)  | O(4W)-Fe(3)-O(7W)   | 91.3(5)  |
| O(9)-Fe(7)-O(17)   | 156.0(4) | O(60)-Fe(3)-O(7W)   | 84.1(4)  |
| O(3)#1-Fe(7)-O(17) | 97.8(4)  | O(58)#1-Fe(3)-O(7W) | 173.8(4) |
| O(37)-Fe(7)-O(38)  | 169.8(4) | O(5W)-Fe(3)-O(7W)   | 88.7(5)  |
| O(9)-Fe(7)-O(38)   | 86.3(4)  | O(4W)-Fe(3)-O(6W)   | 95.1(5)  |
| O(3)#1-Fe(7)-O(38) | 92.1(4)  | O(60)-Fe(3)-O(6W)   | 86.0(4)  |
| O(17)-Fe(7)-O(38)  | 83.2(4)  | O(58)#1-Fe(3)-O(6W) | 88.0(4)  |
| O(37)-Fe(7)-O(64)  | 87.6(4)  | O(5W)-Fe(3)-O(6W)   | 173.8(5) |
| O(9)-Fe(7)-O(64)   | 85.5(4)  | O(7W)-Fe(3)-O(6W)   | 87.0(5)  |
| O(3)#1-Fe(7)-O(64) | 168.7(3) |                     |          |

Symmetry transformations used to generate equivalent atoms: #1 -x+1,-y+3,-z+1; #2 -x+1,-y+2,-z+2; #3 x,y-1,z+1; #4 -x,-y+2,-z+2; #5 x,y+1,z-1

**Table S7.** Selected bonds lengths (Å) and angles (°) for compound **2**.

|            |           |               |           |
|------------|-----------|---------------|-----------|
| W(1)-O(11) | 1.729(10) | W(8)-O(31)    | 1.726(10) |
| W(1)-O(14) | 1.899(9)  | W(8)-O(4)     | 1.819(9)  |
| W(1)-O(6)  | 1.923(9)  | W(8)-O(8)     | 1.878(9)  |
| W(1)-O(22) | 1.924(10) | W(8)-O(17)    | 1.988(10) |
| W(1)-O(19) | 1.941(9)  | W(8)-O(21)    | 2.012(9)  |
| W(1)-O(18) | 2.240(9)  | W(8)-O(3)     | 2.238(9)  |
| W(2)-O(24) | 1.730(9)  | W(9)-O(35)    | 1.699(10) |
| W(2)-O(5)  | 1.836(9)  | W(9)-O(30)    | 1.800(9)  |
| W(2)-O(26) | 1.902(10) | W(9)-O(26)    | 1.928(10) |
| W(2)-O(15) | 1.980(10) | W(9)-O(25)    | 1.942(10) |
| W(2)-O(9)  | 1.994(10) | W(9)-O(14)    | 2.025(9)  |
| W(2)-O(1)  | 2.211(9)  | W(9)-O(18)    | 2.242(9)  |
| W(3)-O(34) | 1.709(10) | Mo(1)-O(3)    | 1.813(9)  |
| W(3)-O(15) | 1.901(10) | Mo(1)-O(18)   | 1.813(9)  |
| W(3)-O(6)  | 1.916(9)  | Mo(1)-O(1)    | 1.823(9)  |
| W(3)-O(7)  | 1.921(9)  | Mo(1)-O(2)    | 1.850(9)  |
| W(3)-O(10) | 1.926(9)  | Fe(1)-O(5)#1  | 1.930(9)  |
| W(3)-O(1)  | 2.282(9)  | Fe(1)-O(4)    | 1.932(9)  |
| W(4)-O(28) | 1.709(10) | Fe(1)-O(12)#1 | 2.052(9)  |
| W(4)-O(9)  | 1.911(9)  | Fe(1)-O(2)#1  | 2.085(9)  |
| W(4)-O(12) | 1.919(9)  | Fe(1)-O(13)   | 2.091(9)  |
| W(4)-O(10) | 1.948(9)  | Fe(1)-O(2)    | 2.092(9)  |
| W(4)-O(33) | 1.948(9)  | Fe(2)-O(23)   | 1.982(10) |
| W(4)-O(1)  | 2.237(9)  | Fe(2)-O(30)   | 1.988(9)  |
| W(5)-O(16) | 1.708(10) | Fe(2)-O(2)    | 2.014(9)  |

|                      |           |                   |           |
|----------------------|-----------|-------------------|-----------|
| W(5)-O(13)           | 1.898(9)  | Fe(2)-O(1W)       | 2.047(10) |
| W(5)-O(21)           | 1.905(10) | Fe(2)-O(12)#1     | 2.057(9)  |
| W(5)-O(33)           | 1.947(10) | Fe(2)-O(13)#1     | 2.062(9)  |
| W(5)-O(20)           | 1.989(10) | Fe(3)-O(11)       | 2.087(10) |
| W(5)-O(3)            | 2.231(9)  | Fe(3)-O(2W)       | 2.125(14) |
| W(6)-O(27)           | 1.707(10) | Fe(3)-O(39)       | 2.152(14) |
| W(6)-O(23)           | 1.804(10) | Fe(3)-O(37)       | 2.187(12) |
| W(6)-O(25)           | 1.918(9)  | Fe(3)-N(3)        | 2.205(14) |
| W(6)-O(8)            | 1.947(9)  | Fe(3)-N(4)        | 2.209(15) |
| W(6)-O(22)           | 2.028(10) | Fe(3)-N(5)        | 2.212(16) |
| W(6)-O(18)           | 2.249(9)  | Fe(4)-O(3W)       | 2.114(13) |
| W(7)-O(32)           | 1.726(10) | Fe(4)-O(4W)       | 2.185(14) |
| W(7)-O(17)           | 1.884(11) | Fe(4)-O(36)       | 2.190(12) |
| W(7)-O(19)           | 1.892(9)  | Fe(4)-O(38)       | 2.203(12) |
| W(7)-O(7)            | 1.924(10) | Fe(4)-N(11)       | 2.221(14) |
| W(7)-O(20)           | 1.972(10) | Fe(4)-N(10)       | 2.230(14) |
| W(7)-O(3)            | 2.270(10) | Fe(4)-N(12)       | 2.231(13) |
| O(3)-Mo(1)-O(18)     | 108.4(4)  | O(11)-Fe(3)-O(37) | 90.1(4)   |
| O(3)-Mo(1)-O(1)      | 107.6(4)  | O(2W)-Fe(3)-O(37) | 87.9(5)   |
| O(18)-Mo(1)-O(1)     | 107.3(4)  | O(39)-Fe(3)-O(37) | 78.8(5)   |
| O(3)-Mo(1)-O(2)      | 111.8(4)  | O(11)-Fe(3)-N(3)  | 94.7(4)   |
| O(18)-Mo(1)-O(2)     | 110.8(4)  | O(2W)-Fe(3)-N(3)  | 86.2(6)   |
| O(1)-Mo(1)-O(2)      | 110.7(4)  | O(39)-Fe(3)-N(3)  | 149.2(5)  |
| O(5)#1-Fe(1)-O(4)    | 96.4(4)   | O(37)-Fe(3)-N(3)  | 71.1(5)   |
| O(5)#1-Fe(1)-O(12)#1 | 94.4(4)   | O(11)-Fe(3)-N(4)  | 89.0(4)   |
| O(4)-Fe(1)-O(12)#1   | 95.5(4)   | O(2W)-Fe(3)-N(4)  | 93.6(6)   |
| O(5)#1-Fe(1)-O(2)#1  | 94.6(4)   | O(39)-Fe(3)-N(4)  | 140.8(6)  |
| O(4)-Fe(1)-O(2)#1    | 166.5(4)  | O(37)-Fe(3)-N(4)  | 140.4(5)  |
| O(12)#1-Fe(1)-O(2)#1 | 91.5(4)   | N(3)-Fe(3)-N(4)   | 69.5(5)   |
| O(5)#1-Fe(1)-O(13)   | 93.7(4)   | O(11)-Fe(3)-N(5)  | 85.0(5)   |
| O(4)-Fe(1)-O(13)     | 92.2(4)   | O(2W)-Fe(3)-N(5)  | 95.9(6)   |
| O(12)#1-Fe(1)-O(13)  | 168.1(4)  | O(39)-Fe(3)-N(5)  | 71.9(6)   |
| O(2)#1-Fe(1)-O(13)   | 79.3(3)   | O(37)-Fe(3)-N(5)  | 150.1(6)  |
| O(5)#1-Fe(1)-O(2)    | 169.5(4)  | N(3)-Fe(3)-N(5)   | 138.6(6)  |
| O(4)-Fe(1)-O(2)      | 93.1(4)   | N(4)-Fe(3)-N(5)   | 69.1(6)   |
| O(12)#1-Fe(1)-O(2)   | 80.2(3)   | O(3W)-Fe(4)-O(4W) | 175.9(6)  |
| O(2)#1-Fe(1)-O(2)    | 76.6(4)   | O(3W)-Fe(4)-O(36) | 91.4(6)   |
| O(13)-Fe(1)-O(2)     | 90.4(3)   | O(4W)-Fe(4)-O(36) | 84.5(5)   |
| O(23)-Fe(2)-O(30)    | 88.7(4)   | O(3W)-Fe(4)-O(38) | 87.7(6)   |
| O(23)-Fe(2)-O(2)     | 91.7(4)   | O(4W)-Fe(4)-O(38) | 91.7(5)   |
| O(30)-Fe(2)-O(2)     | 91.9(4)   | O(36)-Fe(4)-O(38) | 79.1(4)   |
| O(23)-Fe(2)-O(1W)    | 89.2(4)   | O(3W)-Fe(4)-N(11) | 90.5(6)   |
| O(30)-Fe(2)-O(1W)    | 89.8(4)   | O(4W)-Fe(4)-N(11) | 92.5(5)   |

|                       |          |                   |          |
|-----------------------|----------|-------------------|----------|
| O(2)-Fe(2)-O(1W)      | 178.1(4) | O(36)-Fe(4)-N(11) | 140.6(5) |
| O(23)-Fe(2)-O(12)#1   | 92.2(4)  | O(38)-Fe(4)-N(11) | 140.3(5) |
| O(30)-Fe(2)-O(12)#1   | 173.8(4) | O(3W)-Fe(4)-N(10) | 88.5(6)  |
| O(2)-Fe(2)-O(12)#1    | 82.0(4)  | O(4W)-Fe(4)-N(10) | 89.9(5)  |
| O(1W)-Fe(2)-O(12)#1   | 96.3(4)  | O(36)-Fe(4)-N(10) | 71.3(5)  |
| O(23)-Fe(2)-O(13)#1   | 173.3(4) | O(38)-Fe(4)-N(10) | 150.1(5) |
| O(30)-Fe(2)-O(13)#1   | 90.8(4)  | N(11)-Fe(4)-N(10) | 69.4(5)  |
| O(2)-Fe(2)-O(13)#1    | 81.6(4)  | O(3W)-Fe(4)-N(12) | 91.0(6)  |
| O(1W)-Fe(2)-O(13)#1   | 97.4(4)  | O(4W)-Fe(4)-N(12) | 92.7(5)  |
| O(12)#1-Fe(2)-O(13)#1 | 87.6(4)  | O(36)-Fe(4)-N(12) | 150.6(5) |
| O(11)-Fe(3)-O(2W)     | 177.4(6) | O(38)-Fe(4)-N(12) | 71.7(5)  |
| O(11)-Fe(3)-O(39)     | 91.7(5)  | N(11)-Fe(4)-N(12) | 68.7(5)  |
| O(2W)-Fe(3)-O(39)     | 86.3(6)  | N(10)-Fe(4)-N(12) | 138.1(5) |

Symmetry transformations used to generate equivalent atoms: #1 -x+2,-y,-z

## References:

1. Contant R, Klemperer W G and Yaghi O. *Inorg Synth.*, 1990, **27**, 104.
2. N. Laronze, J. Marrot and G. Hervé, *Chem. Commun.*, 2003, **18**, 2360.
3. A. A. Abu-Hussen and W. Linert, *Spectrochim. Acta, Part A*, 2009, **74**, 214.
4. (a) X. M. Luo, N. F. Li, Z. B. Hu, J. B. Cao, C. H. Cui, Q. F. Ling and Y. Xu. *Inorg. Chem.*, 2019, **58**, 2463; (b) J. Shi, Y. Xiong, M. J. Zhou, L. Chen and Y. Xu. *RSC Adv.*, 2017, **7**, 55427; (c) G. H. Hu, H. Miao, H. Mei, S. Zhou and Y. Xu. *Dalton Trans.*, 2016, **45**, 7947; (d) Y. Y. Dong, G. H. Hu, H. Miao, X. X. He, M. Fang and Y. Xu, *Inorg. Chem.*, 2016, **55**, 11621.
5. (a) W. H. Guo, X. L. Tong and S. B. Liu, *Electrochim Acta.*, 2015, **173**, 540; (b) Y. W. Liu, S. M. Liu, X. Y. Lai, J. Miao, D. F. He, N. Li, F. Luo, Z. Shi and S. X. Liu, *Adv. Funct. Mater.*, 2015, **25**, 4480; (c) P. W. Huo, M. J. Zhou, Y. F. Tang, X. L. Liu, C. C. Ma, L. B. Yu and Y. S. Yan, *J. Alloys Compd.*, 2016, **670**, 198; (d) J. J. Xie, Y. Zhang, Y. L. Han and C. L. Li, *ACS Nano*, 2016, **10**, 5304.
6. (a) J. Arias-Pardilla, H. J. Salavagione, C. Barbero, E. Morallon and J. L. Vázquez, *Eur. Polym. J.*, 2006, **42**, 1521; (b) L. Xu, H. Zhang, E. Wang, D. G. Kurth and Z. Li, *J. Mater. Chem.*, 2002, **12**, 654.
7. (a) X. Q. Lin, X. Z. Li, F. Li, Y. Y. Fang, M. Tian, X. C. An, Y. Fu, J. Jin and J. T. Ma, *J. Mater. Chem. A*, 2016, **4**, 6505; (b) L. Salvati Jr, L. E. Makovsky, J. M. Stencel, F. R. Brown and D. M. Hercules, *J. Phys. Chem.*, 1981, **85**, 3700.
8. C. Pichon, A. Dolbecq, P. Mialane, J. Marrot, E. Rivière, M. Goral, E. Rivière, M. Goral, M. Zynek, T. McCormac, S. A. Borshch, E. Zueva and F. Sécheresse, *Chem. Eur. J.*, 2008, **14**, 3189.
9. B. Z. Lin, L. W. He, B. H. Xu, X. L. Li, Z. Li and P. D. Liu. *Cryst. Growth Des.*, 2008, **9**, 273.

- 
10. (a) J. Sha, J. Peng, Y. Lan, Z. M. Su, H. J. Pang, A. X. Tian, P. P. Zhang and M. Zhu. *Inorg. Chem.*, 2008, **47**, 5145; (b) H. Fu, Y. G. Li, Y. Lu, W. L. Chen, Q. Wu, J. X. Meng, X. L. Wang, Z.-M Zhang and E.-B. Wang. *Cryst. Growth Des.*, 2011, **11**, 458.
11. (a) B. Godin, J. Vaissermann, P. Herson, L. Ruhlmann, M. Verdaguera and P. Gouzerh, *Chem. Commun.*, 2005, **45**, 5624; (b) B. Botar, Y. V. Geletii, P. Kögerler, D. G. Musaev, K. Morokuma, I. A. Weinstock and C. L. Hill. *J. Am. Chem. Soc.*, 2006, **128** 11268; (c) L. H. Bi, U. L. Kortz, S. Nellutla, A. C. Stowe, J. V. Tol, N. S. Dalal, B. Keita, and L. Nadjio. *Inorg. Chem.*, 2005, **44**, 896.
12. (a) W. Zhao, P. Palffy-Muhoray. *Appl. Phys. Lett.*, 1994, **65**, 673; (b) D. G. McLean, R. L. Sutherland, M. C. Brant, D. M. Brandelik, P. A. Fleitz and T. Pottenger. *Opt. Lett.*, 1993, **18**, 858; (c) M. Sheik-Bahae, A. A. Said, T. H. Wei, D. J. Hagan and E. W. Van Stryland. *IEEE journal of quantum electronics.*, 1990, **26**, 760.
